# Supplementary material for: Real life persistence rate with antimuscarinic treatment in patients with idiopathic or neurogenic overactive bladder: a prospective cohort study with solifenacin
Source: Springer Nature journal article supplement (doi:10.1186/s12894-017-0216-4), 2017-04-12
Supplement: MOESM1 [file 12220596]

## Dataset 1. Real life persistence Solifenacin

This is a data set for a study of the real life persistence rate with antimuscarinic treatment in patients with idiopathic or neurogenic overactive bladder

corresponding author: M. Tijnnagel (mtijn@hotmail.com)

Please contact M. Tijnnagel if you plan to conduct analyses on these data for publication

| variable            | description                                                        |
|---------------------|--------------------------------------------------------------------|
| sex                 |                                                                    |
| age                 |                                                                    |
| starting dose       | starting dose of solifenacin                                       |
| condition           | idiopathic or neurogenic overactive bladder                        |
| still taking        | persistence after one year (J= Yes,N=No)                           |
| why stop            | reason mentioned why participant had stopped taking solifenacin    |
| side effects        | presence of side effects observed by the participant (J= Yes,N=No) |
| type of side effect | type of side effect as mentioned by participant                    |

| Sex | Age   | starting dose | Condition | still taking? | Why stop | Side effects | Type of side effect                     |
|-----|-------|---------------|-----------|---------------|----------|--------------|-----------------------------------------|
| F   | 70-74 | 10 mg/day     | I         | J             |          | J            | dry mouth                               |
| F   | 80-84 | 5 mg/day      | I         | J             |          | J            | dry mouth                               |
| F   | 75-79 | 5 mg/day      | I         | J             |          | J            | dry mouth                               |
| F   | 75-79 | 5 mg/day      | I         | J             |          | J            | dry mouth                               |
| F   | 50-54 | 5 mg/day      | I         | J             |          | J            | dry mouth                               |
| F   | 65-69 | 5 mg/day      | I         | J             |          | J            | constipation                            |
| F   | 70-74 | 5 mg/day      | I         | J             |          | J            | blurred vision, constipation, dry mouth |
| F   | 85-89 | 5 mg/day      | I         | J             |          | N            |                                         |
| F   | 60-64 | 5 mg/day      | I         | J             |          | N            |                                         |
| F   | 45-49 | 5 mg/day      | N         | J             |          | J            | edema                                   |
| F   | 45-49 | 5 mg/day      | N         | J             |          | J            | dry eyes                                |
| F   | 55-59 | 10 mg/day     | N         | J             |          | J            | fatigue                                 |
| F   | 60-64 | 5 mg/day      | N         | J             |          | N            |                                         |
| F   | 60-64 | 5 mg/day      | N         | J             |          | N            |                                         |
| F   | 55-59 | 5 mg/day      | N         | J             |          | N            |                                         |
| F   | 55-59 | 5 mg/day      | N         | J             |          | N            |                                         |
| F   | 45-49 | 5 mg/day      | N         | J             |          | N            |                                         |
| F   | 40-44 | 5 mg/day      | N         | J             |          | N            |                                         |
| F   | 40-44 | 5 mg/day      | N         | J             |          | N            |                                         |
| F   | 30-34 | 5 mg/day      | N         | J             |          | N            |                                         |
| M   | 60-64 | 10 mg/day     | I         | J             |          | J            | less diarrhea                           |
| M   | 80-84 | 10 mg/day     | I         | J             |          | J            | dry mouth                               |
| M   | 80-84 | 5 mg/day      | I         | J             |          | J            | dry mouth                               |
| M   | 75-79 | 5 mg/day      | I         | J             |          | J            | dry mouth                               |
| M   | 70-74 | 5 mg/day      | I         | J             |          | J            | dry mouth                               |
| M   | 60-64 | 5 mg/day      | I         | J             |          | J            | dry mouth                               |
| M   | 60-64 | 5 mg/day      | I         | J             |          | J            | dry mouth                               |
| M   | 35-39 | 5 mg/day      | I         | J             |          | J            | heartburn, constipation                 |

|   |       |               |   |   |                                   |   |                                                         |
|---|-------|---------------|---|---|-----------------------------------|---|---------------------------------------------------------|
| M | 90-94 | 10 mg/day     | I | J |                                   | N |                                                         |
| M | 55-59 | 10 mg/day     | I | J |                                   | N |                                                         |
| M | 75-79 | 2,5 mg/2 days | I | J |                                   | N |                                                         |
| M | 80-84 | 5 mg/day      | I | J |                                   | N |                                                         |
| M | 80-84 | 5 mg/day      | I | J |                                   | N |                                                         |
| M | 70-79 | 5 mg/day      | I | J |                                   | N |                                                         |
| M | 75-79 | 5 mg/day      | I | J |                                   | N |                                                         |
| M | 65-69 | 5 mg/day      | I | J |                                   | N |                                                         |
| M | 55-59 | 5 mg/day      | I | J |                                   | N |                                                         |
| M | 45-49 | 5 mg/day      | I | J |                                   | N |                                                         |
| M | 55-59 | 5 mg/day      | N | J |                                   | J | dry skin, itch, dry mouth                               |
| M | 45-49 | 5 mg/day      | N | J |                                   | J | dry mouth                                               |
| M | 40-44 | 5 mg/day      | N | J |                                   | J | dry mouth                                               |
| M | 30-34 | 5 mg/day      | N | J |                                   | J | dry mouth                                               |
| M | 70-74 | 5 mg/day      | N | J |                                   | J | dry mouth, constipation                                 |
| M | 60-64 | 10 mg/day     | N | J |                                   | J | dry mouth                                               |
| M | 50-54 | 5 mg/day      | N | J |                                   | J | constipation, dry mouth                                 |
| M | 40-44 | 10 mg/day     | N | J |                                   | N |                                                         |
| M | 25-29 | 10 mg/day     | N | J |                                   | N |                                                         |
| M | 65-69 | 5 mg/day      | N | J |                                   | N |                                                         |
| M | 60-64 | 5 mg/day      | N | J |                                   | N |                                                         |
| M | 50-54 | 5 mg/day      | N | J |                                   | N |                                                         |
| F | 65-69 | 5 mg/day      | I | N | side effects                      | J | abdominal pain, dry mouth, constipation, nausea         |
| F | 60-64 | 5 mg/day      | I | N | lack of efficacy                  | J | abdominal pain, dry mouth, constipation, blurred vision |
| F | 65-69 | 10 mg/day     | I | N | lack of efficacy                  | J | dry mouth                                               |
| F | 85-89 | 5 mg/2 days   | I | N | unknown                           | J | dry mouth                                               |
| F | 65-69 | 5 mg/day      | I | N | lack of efficacy and side effects | J | dry mouth                                               |
| F | 45-49 | 5 mg/day      | I | N | lack of efficacy and side effects | J | dry mouth                                               |
| F | 40-44 | 5 mg/day      | I | N | lack of efficacy                  | J | dry mouth                                               |
| F | 45-49 | 5 mg/day      | I | N | unknown                           | J | dry mouth, constipation, blurred vision, abdominal pain |

|   |       |             |   |   |                                   |   |                                                   |
|---|-------|-------------|---|---|-----------------------------------|---|---------------------------------------------------|
| F | 55-59 | 5 mg/day    | I | N | side effects                      | J | dry mouth, nausea, dizziness                      |
| F | 65-69 | 5 mg/day    | I | N | side effects                      | J | dry mouth, constipation, headache                 |
| F | 50-54 | 5 mg/day    | I | N | side effects                      | J | dry eyes, dry mouth                               |
| F | 75-79 | 5 mg/day    | I | N | side effects                      | J | palpitations                                      |
| F | 60-64 | 5 mg/2 days | I | N | side effects                      | J | headache                                          |
| F | 20-24 | 5 mg/day    | I | N | side effects                      | J | stomach pain                                      |
| F | 80-84 | 5 mg/day    | I | N | side effects                      | J | fatigue, dizziness                                |
| F | 60-64 | 5 mg/day    | I | N | side effects                      | J | edema                                             |
| F | 40-44 | 5 mg/day    | I | N | lack of efficacy and side effects | J | abdominal pain                                    |
| F | 65-69 | 5 mg/day    | I | N | residu                            | J | residu                                            |
| F | 60-64 | 5 mg/day    | I | N | lack of efficacy and side effects | J | blurred vision, edema                             |
| F | 50-54 | 5 mg/day    | I | N | lack of efficacy                  | J | blurred vision, dry mouth                         |
| F | 45-49 | 5 mg/day    | I | N | lack of efficacy                  | N |                                                   |
| F | 45-49 | 5 mg/day    | I | N | lack of efficacy                  |   |                                                   |
| F | 50-54 | 5 mg/day    | N | N | side effects                      | J | concentration problems, constipation              |
| F | 60-64 | 5 mg/day    | N | N | lack of efficacy                  | J | dry mouth                                         |
| F | 55-59 | 5 mg/day    | N | N | lack of efficacy                  | J | dry mouth                                         |
| F | 50-54 | 5 mg/day    | N | N | side effects                      | J | dry mouth                                         |
| F | 40-44 | 5 mg/day    | N | N | lack of efficacy                  | N |                                                   |
| F | 20-24 | 5 mg/day    | N | N | lack of efficacy                  | N |                                                   |
| M | 70-74 | 5 mg/day    | I | N | unknown                           | J | constipation                                      |
| M | 70-74 | 5 mg/day    | I | N | lack of efficacy                  | J | dry mouth                                         |
| M | 65-69 | 5 mg/day    | I | N | lack of efficacy                  | J | dry mouth                                         |
| M | 65-69 | 5 mg/day    | I | N | lack of efficacy                  | J | dry mouth, constipation                           |
| M | 75-79 | 5 mg/day    | I | N | unknown                           | J | dry mouth, constipation                           |
| M | 75-79 | 5 mg/day    | I | N | lack of efficacy and side effects | J | dry mouth, hesitation                             |
| M | 65-69 | 10 mg/day   | I | N | lack of efficacy and side effects | J | dry mouth, constipation, dry eyes, blurred vision |
| M | 70-74 | 5 mg/day    | I | N | side effects                      | J | dry eyes, stomach pain                            |
| M | 70-74 | 5 mg/day    | I | N | side effects                      | J | glaucoma, red eyes                                |
| M | 75-79 | 5 mg/day    | I | N | lack of efficacy and side effects | J | constipation                                      |

|   |         |             |   |         |                                           |   |                         |
|---|---------|-------------|---|---------|-------------------------------------------|---|-------------------------|
| M | 70-74   | 5 mg/day    | I | N       | side effects                              | J | constipation, dry mouth |
| M | 65-69   | 5 mg/day    | I | N       | residu                                    | J | residu                  |
| M | 80-84   | 5 mg/day    | I | N       | lack of efficacy                          | N |                         |
| M | 80-84   | 5 mg/day    | I | N       | ran out of medication                     | N |                         |
| M | 80-84   | 5 mg/day    | I | N       | lack of efficacy                          | N |                         |
| M | 75-79   | 5 mg/day    | I | N       | unknown                                   | N |                         |
| M | 70-74   | 5 mg/day    | I | N       | lack of efficacy                          | N |                         |
| M | 70-74   | 5 mg/day    | I | N       | lack of efficacy                          | N |                         |
| M | 70-74   | 5 mg/day    | I | N       | lack of efficacy                          | N |                         |
| M | 65-69   | 5 mg/day    | I | N       | not allowed to used because of other medi | N |                         |
| M | 65-69   | 5 mg/day    | I | N       | lack of efficacy                          | N |                         |
| M | 55-59   | 5 mg/day    | I | N       | lack of efficacy                          | N |                         |
| M | 45-49   | 5 mg/day    | I | N       | lack of efficacy                          | N |                         |
| M | 45-49   | 5 mg/day    | I | N       | complaints dysappeared                    | N |                         |
| M | 20-24   | 5 mg/day    | I | N       | lack of efficacy                          | N |                         |
| M | 75-79   | 5 mg/day    | I | N       | unknown                                   |   |                         |
| M | 70-74   | 5 mg/day    | N | N       | unknown                                   | J | constipation            |
| M | 60-64   | 5 mg/day    | N | N       | side effects                              | J | droge mond en maagpijn  |
| M | 60-64   | 5 mg/day    | N | N       | side effects                              | J | itch                    |
| M | 70-74   | 5 mg/day    | N | N       | not allowed to used because of other medi | N |                         |
| M | 50-54   | 5 mg/day    | N | N       | lack of efficacy and side effects         | N |                         |
| M | 40-44   | 5 mg/day    | N | N       | lack of efficacy                          | N |                         |
| M | 35-39   | 5 mg/day    | N | N       | lack of efficacy                          | N |                         |
| F | missing | missing     | I | unknown |                                           | J | constipation            |
| F | 75-79   | 5 mg/2 days | I | unknown |                                           |   |                         |
| F | missing | 5 mg/day    | I | unknown |                                           |   |                         |
| F | 45-49   | 5 mg/day    | N | unknown |                                           |   |                         |
| F | missing | 5 mg/day    | N | unknown |                                           |   |                         |
| M | 65-69   | 5 mg/day    | I | unknown |                                           | N |                         |
| M | 45-49   | 5 mg/day    | I | unknown |                                           | N |                         |

|   |       |           |   |         |  |  |  |
|---|-------|-----------|---|---------|--|--|--|
| M | 80-84 | 5 mg/day  | I | unknown |  |  |  |
| M | 70-74 | 5 mg/day  | I | unknown |  |  |  |
| M | 70-74 | 5 mg/day  | I | unknown |  |  |  |
| M | 20-24 | 10 mg/day | N | unknown |  |  |  |
| M | 50-54 | 5 mg/day  | N | unknown |  |  |  |
